# Supplementary material
Source: PubMed Central journal article supplement (PMC2771365)
Supplement: NIHMS128019-supplement-supp_file.pdf [file NIHMS128019-supplement-supp_file.pdf]

## SUPPLEMENTARY DATA

### A novel splice variant of GLI1 that promotes glioblastoma cell migration and invasion

Hui-Wen Lo<sup>1,2,3,\*</sup>, Hu Zhu<sup>1</sup>, Xinyu Cao<sup>1</sup>, Amy Aldrich<sup>1</sup>, and Francis Ali-Osman<sup>1,2,3</sup>

**Figure S1. The tGLI1 variant is frequently expressed in human breast cancer cells.** Total RNA extracted from seven human breast cancer cell lines were subjected to RT-PCR to detect GLI1 and tGLI1 transcripts. Levels of  $\beta$ -actin transcripts were also determined to control for equal loading. The results showed that these cells expressed comparable levels of both GLI1 and tGLI1 transcripts. Lanes: 1, MCF-7; 2, BT-20; 3, SK-BR-3; 4, ZR75-1; 5, MDA-MB-361; 6, MDA-MB-453; 7, MDA-MB-468.

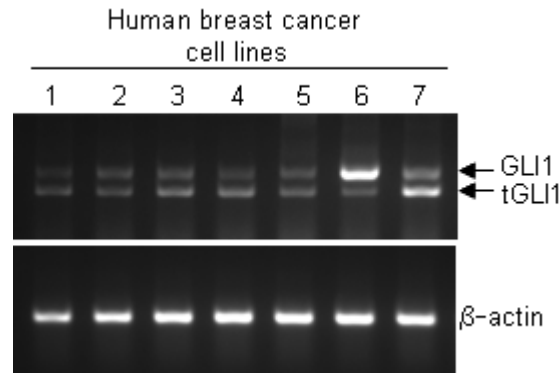

**Figure S2. Cluster analysis of genes that are significantly and differentially expressed between U87MG-GLI1 and U87MG-tGLI1 cells.** Based on the DNA microarray data and subsequent ANOVA analysis, genes differentially expressed between U87MG-GLI1 and U87MG-tGLI1 cells were subjected to cluster analysis. A total of 101 genes were identified to be significantly up-regulated or down-regulated ( $\geq 2$  fold;  $p < 0.05$ ) in U87MG-tGLI1 cells relative to U87MG-GLI1 and U87MG-vector cells. In U87MG-tGLI1 cells, 75 genes were expressed at a significantly higher level and 26 genes were more suppressed compared to U87MG-vector and U87MG-GLI1 cells.

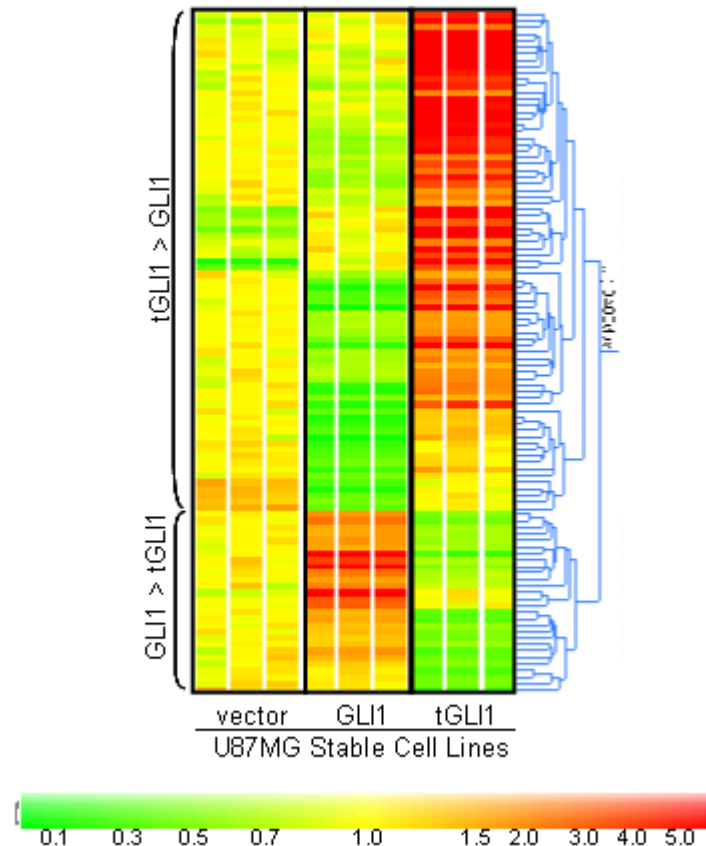

**Figure S3. MEST gene expression is enhanced by tGLI1 but is not involved in tGLI1-mediated invasiveness in U87MG GBM cells.**

**A: MEST gene transcription is increased in U87MG-tGLI1 cells compared to U87MG-vector and U87MG-GLI1 cells.** U87MG stable transfectants were subjected to RT-PCR (top) and RT-qPCR (bottom) to determine the levels of MEST and GAPDH transcripts. DNA sequences for primers that amplify MEST gene transcripts are 5'-TTTCCAACATCCAGCTACGA-3' (forward) and 5'-GGCCTGCTCAAATATGGAAT-3' (reverse).

**B: Activity of the MEST gene promoter is higher in U87MG-tGLI1 cells compared to U87MG-vector and U87MG-GLI1 cells.** The luciferase reporter construct, pMEST-Luc, contains a 1 kb human MEST gene promoter fragment, which was generated by PCR using primers, 5'-ATGCTAGCCACTTCGTGACTACTCTAC-3' (forward) and 5'-GGAGATCTCCGACTTTTAGAGCCCAC-3' (reverse). The promoter fragment was restricted by NheI and BglII and then ligated into the cohesive ends of the promoter-less pGL3-basic luciferase vector (Promega). The pMEST-Luc and pRL-TK (normalization control) reporter constructs were co-transfected into U87MG stable transfectants for 48 hrs and luciferase activity determined. Three independent experiments were performed to derive means and standard deviations.

**C,D: MEST expression down-regulation did not affect the invasiveness of U87MG-tGLI1 cells.** U87MG-tGLI1 cells were transfected with non-targeting control siRNA, CD24 siRNA and MEST siRNA for 48 hrs and subjected to RT-PCR and western blotting (C) and invasion assay (D). As indicated by results in panel C, MEST siRNA specifically down-regulated MEST but not CD24 and  $\beta$ -actin transcripts. In panel D (top), cell proliferative rates were also determined using Celltiter Blue Cell Viability assay kit to derive net invasiveness (invasiveness:proliferation). Three independent experiments were conducted to derive means and standard deviation. The bottom panel shows representative invaded tumor cells that have been stained by 0.5% crystal violet.

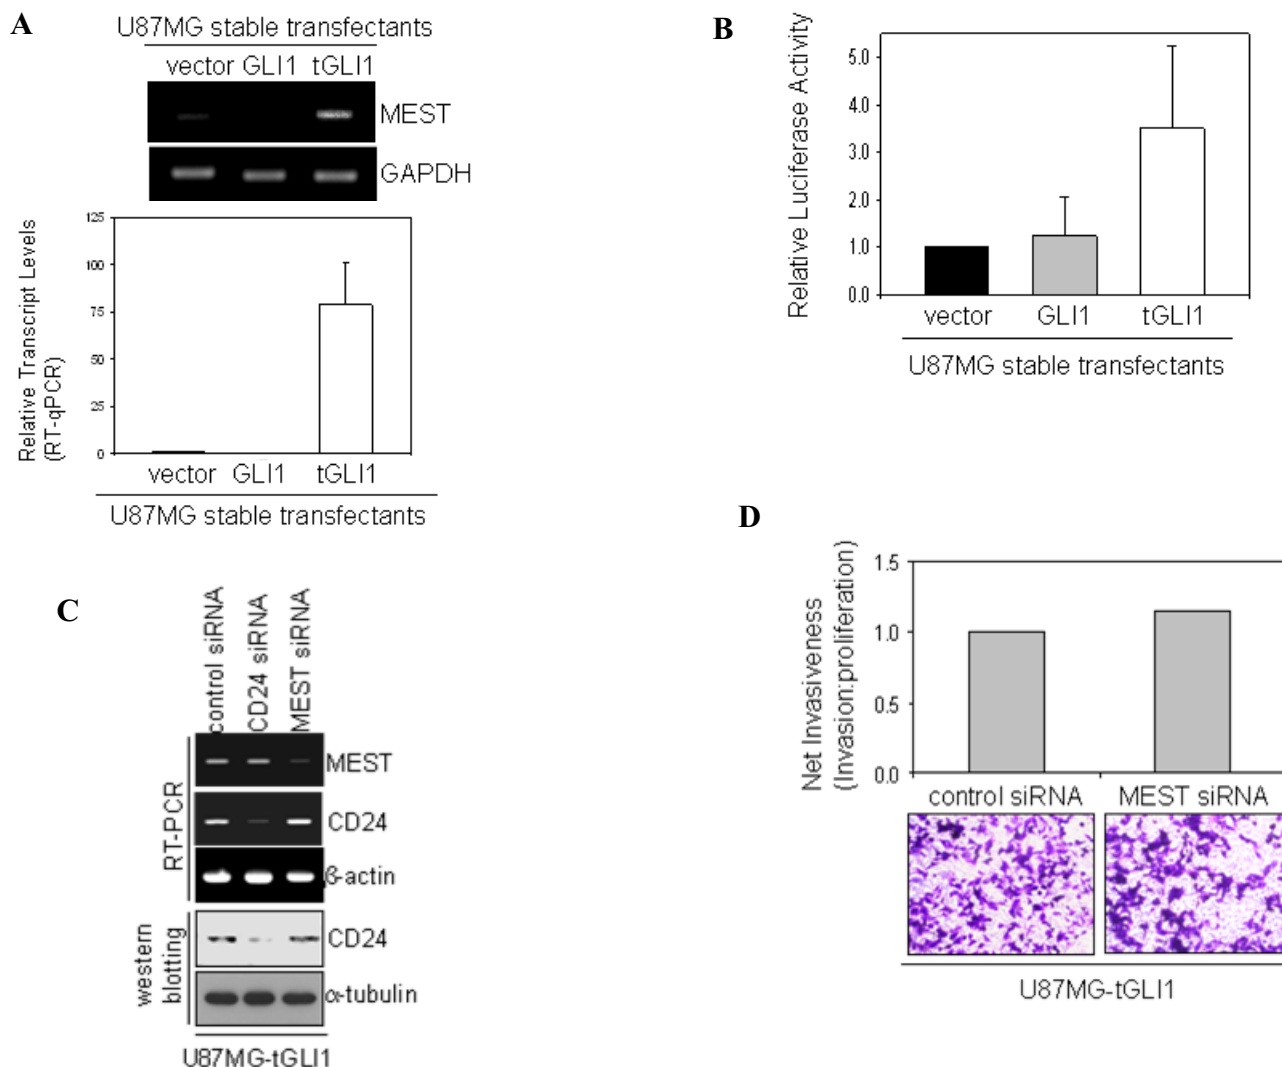

**Figure S4. Transcriptional over-expression and down-regulation of CD24 did not significantly affect cell proliferation of U87MG GBM cells.** To determine the effects of CD24 expression on U87MG cell proliferation, we transcriptionally down-regulated CD24 gene expression using U87MG-tGLI1 cells who express high levels of CD24 (A) and over-expressed CD24 using U87MG cells with low levels of CD24 (B). These cells were also transfected with non-targeting siRNA and parental vector to control for CD24 siRNA and CD24 expression vector, respectively. Cell viability was then determined using Celltiter Blue Cell Viability assay kit (Promega) for 0-72 hrs. The viability at 0 hr was regarded as 1.0. Three independent experiments were performed to derive means and standard deviations. The student t-test was conducted and showed that CD24 expression did not significantly affect proliferation of U87MG GBM cells.

**A**

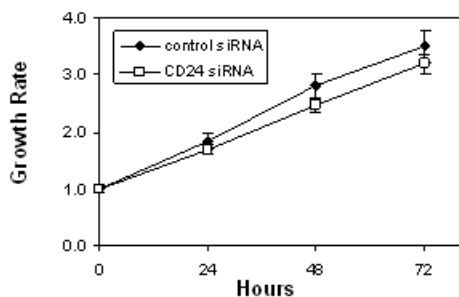

**B**

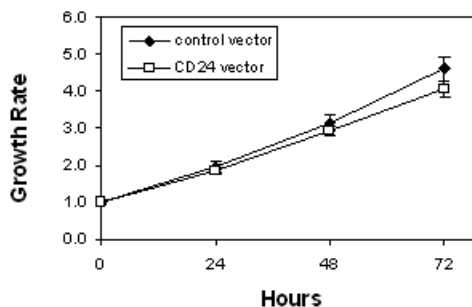

## SUPPLEMENTARY TABLE I & II

**Table I Genes significantly up-regulated in U87MG-tGLI1 cells compared to U87MG-GLI1 and U87MG-vector cells.** DNA microarray data were subjected to ANOVA analysis to identify genes that are expressed in U87MG-tGLI1 cells at a significantly higher level, namely, at least 2-fold and  $p < 0.05$ , compared to U87MG-GLI1 and U87MG-vector cells. The analysis revealed 79 hits corresponding to 75 genes in which both EPB41L4B and GREM2 genes had two hits each and for the FHL1 gene, three hits.

| Probe Set ID | Gene Name                                                                  | Gene Symbol | Fold change<br>tGLI1 versus<br>GLI1 | p-value  |
|--------------|----------------------------------------------------------------------------|-------------|-------------------------------------|----------|
| 202016_at    | mesoderm specific transcript homolog (mouse)                               | MEST        | 260.2                               | 1.01E-04 |
| 227099_s_at  | hypothetical LOC387763                                                     | LOC387763   | 150.3                               | 6.70E-05 |
| 209771_x_at  | CD24 antigen (small cell lung carcinoma cluster 4 antigen)                 | CD24        | 55.3                                | 6.70E-05 |
| 227522_at    | similar to mouse 2310016A09Rik gene                                        | LOC134147   | 50.2                                | 1.01E-04 |
| 223120_at    | fucosidase, alpha-L- 2, plasma                                             | FUCA2       | 49.0                                | 1.02E-04 |
| 1558692_at   | Hypothetical protein MGC13102                                              | MGC13102    | 44.4                                | 6.70E-05 |
| 228260_at    | ELAV (embryonic lethal, abnormal vision, Drosophila)-like 2 (Hu antigen B) | ELAVL2      | 25.3                                | 6.70E-05 |
| 228280_at    | similar to RIKEN cDNA 1200014N16 gene                                      | MGC14289    | 24.1                                | 1.02E-04 |
| 226702_at    | hypothetical protein LOC129607                                             | LOC129607   | 24.0                                | 9.96E-05 |
| 202310_s_at  | collagen, type I, alpha 1                                                  | COL1A1      | 20.8                                | 1.02E-04 |
| 203060_s_at  | 3'-phosphoadenosine 5'-phosphosulfate synthase 2                           | PAPSS2      | 20.4                                | 1.01E-04 |
| 1552658_a_at | neuron navigator 3                                                         | NAV3        | 19.0                                | 1.40E-04 |
| 219295_s_at  | procollagen C-endopeptidase enhancer 2                                     | PCOLCE2     | 15.4                                | 1.01E-04 |
| 201540_at    | four and a half LIM domains 1                                              | FHL1        | 14.4                                | 1.01E-04 |
| 223710_at    | chemokine (C-C motif) ligand 26                                            | CCL26       | 14.2                                | 1.32E-04 |
| 232027_at    | spectrin repeat containing, nuclear envelope 1                             | SYNE1       | 11.8                                | 9.94E-05 |
| 230085_at    | Transcribed locus                                                          |             | 11.7                                | 1.01E-04 |
| 216095_x_at  | myotubularin related protein 1                                             | MTMR1       | 11.1                                | 1.02E-04 |
| 1569290_s_at | glutamate receptor, ionotropic, AMPA 3                                     | GRIA3       | 9.7                                 | 1.02E-04 |
| 218918_at    | mannosidase, alpha, class 1C, member 1                                     | MAN1C1      | 9.3                                 | 1.01E-04 |
| 223502_s_at  | tumor necrosis factor (ligand) superfamily, member 13b                     | TNFSF13B    | 9.2                                 | 7.66E-05 |
| 220161_s_at  | erythrocyte membrane protein band 4.1 like 4B                              | EPB41L4B    | 9.1                                 | 1.01E-04 |
| 235603_at    | heterogeneous nuclear ribonucleoprotein U (scaffold attachment factor A)   | HNRPU       | 9.0                                 | 1.02E-04 |
| 204319_s_at  | regulator of G-protein signalling 10                                       | RGS10       | 8.4                                 | 1.10E-04 |
| 223427_s_at  | erythrocyte membrane protein band 4.1 like 4B                              | EPB41L4B    | 7.9                                 | 1.01E-04 |
| 230560_at    | syntaxin binding protein 6 (amisyn)                                        | STXBP6      | 7.8                                 | 1.16E-04 |
| 225975_at    | protocadherin 18                                                           | PCDH18      | 7.4                                 | 1.12E-04 |
| 225786_at    | hypothetical protein LOC284702                                             | LOC284702   | 7.3                                 | 1.02E-04 |
| 224901_at    | stearoyl-CoA desaturase 5                                                  | SCD5        | 7.2                                 | 1.01E-04 |
| 240509_s_at  | gremlin 2, cysteine knot superfamily, homolog (Xenopus laevis)             | GREM2       | 7.1                                 | 1.01E-04 |
| 210298_x_at  | four and a half LIM domains 1                                              | FHL1        | 6.9                                 | 1.31E-04 |
| 201539_s_at  | four and a half LIM domains 1                                              | FHL1        | 6.9                                 | 1.01E-04 |

|              |                                                                                                                   |           |     |          |
|--------------|-------------------------------------------------------------------------------------------------------------------|-----------|-----|----------|
| 201310_s_at  | chromosome 5 open reading frame 13                                                                                | C5orf13   | 6.6 | 1.45E-04 |
| 201162_at    | insulin-like growth factor binding protein 7                                                                      | IGFBP7    | 6.5 | 1.02E-04 |
| 219938_s_at  | proline-serine-threonine phosphatase interacting protein 2                                                        | PSTPIP2   | 6.5 | 1.14E-04 |
| 230272_at    | CDNA FLJ30810 fis, clone FEBRA2001440                                                                             |           | 6.5 | 1.01E-04 |
| 227001_at    | NIPA-like domain containing 2                                                                                     | FLJ13955  | 6.4 | 6.70E-05 |
| 228959_at    | CDNA clone IMAGE:5262734                                                                                          |           | 6.3 | 9.94E-05 |
| 203700_s_at  | deiodinase, iodothyronine, type II                                                                                | DIO2      | 6.1 | 1.02E-04 |
| 1564837_at   | hypothetical LOC151760                                                                                            | LOC151760 | 5.9 | 1.01E-04 |
| 209529_at    | phosphatidic acid phosphatase type 2C                                                                             | PPAP2C    | 5.7 | 1.10E-04 |
| 209121_x_at  | nuclear receptor subfamily 2, group F, member 2                                                                   | NR2F2     | 5.5 | 1.18E-04 |
| 238673_at    | Transcribed locus                                                                                                 |           | 5.1 | 1.02E-04 |
| 223340_at    | spastic paraplegia 3A (autosomal dominant)                                                                        | SPG3A     | 4.9 | 1.07E-04 |
| 47550_at     | leucine zipper, putative tumor suppressor 1                                                                       | LZTS1     | 4.7 | 1.25E-04 |
| 219230_at    | hypothetical protein FLJ10970                                                                                     | FLJ10970  | 3.9 | 1.01E-04 |
| 228191_at    | CDNA FLJ33420 fis, clone BRACE2020028                                                                             |           | 3.7 | 1.01E-04 |
| 201506_at    | transforming growth factor, beta-induced, 68kDa                                                                   | TGFBI     | 3.6 | 1.01E-04 |
| 229285_at    | ribonuclease L (2',5'-oligoadenylate synthetase-dependent)                                                        | RNASEL    | 3.6 | 1.14E-04 |
| 235683_at    | sestrin 3                                                                                                         | SESN3     | 3.5 | 1.31E-04 |
| 203126_at    | inositol(myo)-1(or 4)-monophosphatase 2                                                                           | IMPA2     | 3.4 | 1.02E-04 |
| 209200_at    | MADS box transcription enhancer factor 2, polypeptide C (myocyte enhancer factor 2C)                              | MEF2C     | 3.4 | 1.01E-04 |
| 235504_at    | gremlin 2, cysteine knot superfamily, homolog (Xenopus laevis)                                                    | GREM2     | 3.3 | 1.01E-04 |
| 236769_at    | hypothetical protein LOC158402                                                                                    | LOC158402 | 3.1 | 1.02E-04 |
| 210222_s_at  | reticulon 1                                                                                                       | RTN1      | 3.1 | 1.01E-04 |
| 241722_x_at  | Transcribed locus, moderately similar to XP_512541.1 PREDICTED: similar to hypothetical protein [Pan troglodytes] |           | 3.1 | 1.24E-04 |
| 225904_at    | chromosome 1 open reading frame 96                                                                                | C1orf96   | 3.0 | 1.14E-04 |
| 235518_at    | solute carrier family 8 (sodium/calcium exchanger), member 1                                                      | SLC8A1    | 3.0 | 1.02E-04 |
| 212944_at    | Mitochondrial ribosomal protein S6                                                                                | MRPS6     | 2.9 | 1.02E-04 |
| 226462_at    | syntaxin binding protein 6 (amisyn)                                                                               | STXBP6    | 2.9 | 9.94E-05 |
| 229256_at    | phosphoglucomutase 2-like 1                                                                                       | PGM2L1    | 2.9 | 1.01E-04 |
| 225585_at    | RAP2A, member of RAS oncogene family                                                                              | RAP2A     | 2.7 | 1.01E-04 |
| 219918_s_at  | asp (abnormal spindle)-like, microcephaly associated (Drosophila)                                                 | ASPM      | 2.7 | 1.01E-04 |
| 227576_at    | CDNA FLJ43311 fis, clone NT2RI2009855                                                                             |           | 2.6 | 1.02E-04 |
| 213093_at    | protein kinase C, alpha                                                                                           | PRKCA     | 2.6 | 1.14E-04 |
| 228306_at    | Cornichon homolog 4 (Drosophila)                                                                                  | HSPC163   | 2.5 | 1.01E-04 |
| 209250_at    | degenerative spermatocyte homolog 1, lipid desaturase (Drosophila)                                                | DEGS1     | 2.5 | 1.12E-04 |
| 200762_at    | dihydropyrimidinase-like 2                                                                                        | DPYSL2    | 2.5 | 1.07E-04 |
| 1555797_a_at | actin related protein 2/3 complex, subunit 5, 16kDa                                                               | ARPC5     | 2.4 | 1.16E-04 |
| 233286_at    | PDZ domain containing RING finger 3                                                                               | PDZRN3    | 2.3 | 1.41E-04 |

|             |                                                                                                   |          |     |          |
|-------------|---------------------------------------------------------------------------------------------------|----------|-----|----------|
| 219481_at   | tetratricopeptide repeat domain 13                                                                | TTC13    | 2.2 | 1.01E-04 |
| 218035_s_at | RNA-binding protein                                                                               | FLJ20273 | 2.2 | 1.12E-04 |
| 212089_at   | lamin A/C                                                                                         | LMNA     | 2.2 | 1.45E-04 |
| 202620_s_at | procollagen-lysine, 2-oxoglutarate 5-dioxygenase 2                                                | PLOD2    | 2.1 | 1.31E-04 |
| 203814_s_at | NAD(P)H dehydrogenase, quinone 2                                                                  | NQO2     | 2.1 | 1.01E-04 |
| 236294_at   | HECT, UBA and WWE domain containing 1                                                             | HUWE1    | 2.1 | 1.01E-04 |
| 217788_s_at | UDP-N-acetyl-alpha-D-galactosamine:polypeptide<br>N-acetylgalactosaminyltransferase 2 (GalNAc-T2) | GALNT2   | 2.0 | 1.02E-04 |

**Table II Genes significantly down-regulated in U87MG-tGLI1 cells compared to U87MG-GLI1 and U87MG-vector cells.** Following DNA microarray and subsequent ANOVA analysis, we identified 26 genes that are significantly down-regulated (at 2-fold and  $p < 0.05$ ) in U87MG-tGLI1 cells compared to U87MG-GLI1 and U87MG-vector cells. The list shows 28 hits but 26 genes as both C9orf72 and ST7L genes had two hits each.

| Probe Set ID | Gene Name                                                                                     | Gene Symbol | Fold change<br>tGli1 versus Gli1 | p-value  |
|--------------|-----------------------------------------------------------------------------------------------|-------------|----------------------------------|----------|
| 225331_at    | chemokine (C-X-C motif) ligand 3                                                              | CXCL3       | 0.02                             | 1.27E-05 |
| 1562048_at   | interleukin 1, beta                                                                           | IL1B        | 0.06                             | 1.45E-03 |
| 220058_at    | vanin 1 ; vanin 1                                                                             | VNN1        | 0.12                             | 9.94E-05 |
| 217990_at    | serpin peptidase inhibitor, clade B (ovalbumin), member 7                                     | SERPINB7    | 0.18                             | 1.02E-04 |
| 204540_at    | ATP-binding cassette, sub-family C (CFTR/MRP), member 9                                       | ABCC9       | 0.18                             | 7.91E-05 |
| 210415_s_at  | kynureninase (L-kynurenine hydrolase)                                                         | KYNU        | 0.19                             | 1.01E-04 |
| 225919_s_at  | synaptotagmin I                                                                               | SYT1        | 0.22                             | 1.01E-04 |
| 213889_at    | dynein, axonemal, light intermediate polypeptide 1                                            | DNALI1      | 0.25                             | 1.21E-04 |
| 1552738_a_at | AN1, ubiquitin-like, homolog ( <i>Xenopus laevis</i> )                                        | ANUBL1      | 0.28                             | 1.14E-04 |
| 217995_at    | chromosome Y open reading frame 15B                                                           | CYorf15B    | 0.28                             | 1.01E-04 |
| 211368_s_at  | solute carrier family 22 (organic cation transporter), member 15                              | SLC22A15    | 0.28                             | 1.02E-04 |
| 211163_s_at  | ring finger protein 149                                                                       | RNF149      | 0.29                             | 1.01E-04 |
| 1552739_s_at | chromosome 9 open reading frame 72                                                            | C9orf72     | 0.30                             | 1.02E-04 |
| 1553159_at   | decay accelerating factor for complement (CD55, Cromer blood group system)                    | DAF         | 0.33                             | 1.01E-04 |
| 201925_s_at  | dynein, axonemal, heavy polypeptide 11                                                        | DNAH11      | 0.33                             | 1.12E-04 |
| 1553134_s_at | suppression of tumorigenicity 7 like                                                          | ST7L        | 0.35                             | 1.13E-04 |
| 225414_at    | tumor necrosis factor receptor superfamily, member 10c, decoy without an intracellular domain | TNFRSF10C   | 0.37                             | 1.01E-04 |
| 228497_at    | caspase 1, apoptosis-related cysteine peptidase (interleukin 1, beta, convertase)             | CASP1       | 0.37                             | 1.28E-04 |
| 214131_at    | sulfide quinone reductase-like (yeast)                                                        | SQRDL       | 0.39                             | 1.01E-04 |
| 223624_at    | suppression of tumorigenicity 7 like                                                          | ST7L        | 0.40                             | 1.14E-04 |
| 227081_at    | phosphatidylinositol glycan, class L                                                          | PIGL        | 0.41                             | 1.12E-04 |
| 203999_at    | chromosome 9 open reading frame 72                                                            | C9orf72     | 0.41                             | 1.29E-04 |
| 210662_at    | outer dense fiber of sperm tails 2                                                            | ODF2        | 0.43                             | 1.07E-04 |
| 208561_at    | eukaryotic translation elongation factor 1 alpha 2                                            | EEF1A2      | 0.44                             | 1.02E-04 |
| 206421_s_at  | guanosine monophosphate reductase 2                                                           | GMPR2       | 0.45                             | 1.02E-04 |
| 205844_at    | chromosome 17 open reading frame 39                                                           | C17orf39    | 0.46                             | 1.01E-04 |
| 205067_at    | hypothetical protein LOC152225                                                                | LOC152225   | 0.46                             | 1.07E-04 |
| 207850_at    | chromosome 3 open reading frame 6                                                             | C3orf6      | 0.49                             | 1.38E-04 |

## SUPPLEMENTARY METHODS

**Plasmids.** GLI1- and tGLI1-expressing plasmids were constructed using the parental pCMV-Tag2b vector (Stratagene) with a 5'-flag tag. Briefly, full-length GLI1 and tGLI1 cDNAs were obtained via RT-PCR using the primers 5'-GGGGATATCATGTTCAACTCGATGACCC (forward) and 5'-GGGGTTCGACGGC ACTAGAGTTGAGGAATTC-3' (reverse), restricted by EcoRV and Sall, and ligated into the pCMV-Tag2b vector. The CD24 mammalian expression plasmid, pCMV-SPORT6-CD24, was from Open Biosystems (Huntsville, AL) and the parental pCMV-SPORT6 vector was obtained from it by restriction digestion with SmaI and ApaI to release the CD24 cDNA and ligation. pCD24-0.14kb-Luc was obtained by releasing a MluI-BmgBI fragment from the pCD24-0.3kb-Luc construct. pCD24-0.25kb-Luc and pCD24-0.2kb-Luc was obtained via mutagenesis.

**Reverse transcription-PCR (RT-PCR).** Total RNA isolation and RT were conducted using SV Total RNA Isolation System (Promega) and Superscript II First-Strand cDNA synthesis system (Invitrogen), retrospectively. The forward and reverse primers used for the PCR were: 5'-TGTTCAACTCGATGACCC-3' and 5'-GTCATGGGGACCACAAGG-3' (exons 1-4 of GLI1 and tGLI1reverse), 5'-GGCGGCA CCACCATGTACCC-3' and 5'-AGGGGCCGGACTCGTCATACT-3' ( $\beta$ -actin), 5'-ATGGGCAGAG CAATGGTGGCCA-3' and 5'-AGAGTGAGACCACGAAGAGACT-3' (CD24), 5'-TCTGGAGCAGAT TTCCAAGGGGAA-3' and 5'-AGGATTAACATAGCCTCTTC TCC-3' (PTCH1), and 5'-TTTCCAAC ATCCAGCTACGA-3' and 5'-GGCCTGCTCAAATATGGAAT-3' (MEST). qRT-PCR was performed in the Mx3005P qPCR System (Stratagene) using the SuperScript III platinum SYBR green one-step qRT-PCR system (Invitrogen). GAPDH gene was used as normalization controls and all experiments were done in triplicates.

### **Transfection and luciferase assay.**

All transfections were performed with cells in exponential growth using lipofectamine 2000 (Invitrogen, Carlsbad, CA) and FuGENE HD (Roche). A Renilla luciferase expression vector, pRL-CMV was used to control for transfection efficiency. Forty-eight hrs after transfection, the cells were lysed and luciferase activity measured using the Firefly and Renilla Luciferase Assay Kit (Biotium, Hayward, CA), as previously described (1-4).

### **Nuclear fractionation, immunofluorescence staining/confocal microscopy.**

These were performed as previously described (1, 2, 5). In the immunofluorescence staining experiments, a mouse monoclonal flag-tag antibody (Sigma) was used to detect flag-tagged GLI1/tGLI1 and a fluorescein-conjugated secondary antibody was used to generate green fluorescence signals. Propidium iodide was used to label nuclei. Fluorescence signals were scanned using a Zeiss LSM 510 confocal microscope.

## REFERENCES

1. Lo H-W, Hsu S-C, Ali-Seyed M, *et al.* Nuclear Interaction of EGFR and STAT3 in the Activation of iNOS/NO Pathway. *Cancer Cell* 2005;7(6):575-89.
2. Lo HW, Cao X, Zhu H, Ali-Osman F. Constitutively Activated STAT3 Frequently Coexpresses with Epidermal Growth Factor Receptor in High-Grade Gliomas and Targeting STAT3 Sensitizes Them to Iressa and Alkylators. *Clin Cancer Res* 2008;14(19):6042-54.
3. Lo HW, Stephenson L, Cao X, Milas M, Pollock R, Ali-Osman F. Identification and functional characterization of the human glutathione S-transferase P1 gene as a novel transcriptional target of the p53 tumor suppressor gene. *Mol Cancer Res* 2008;6(5):843-50.
4. Lo H-W, Hsu S-C, Xia W, *et al.* Epidermal Growth Factor Receptor Cooperates with Signal Transducer and Activator of Transcription 3 to Induce Epithelial-Mesenchymal Transition in Cancer Cells via Up-regulation of TWIST Gene Expression. *Cancer Res* 2007;67(19):9066-76.
5. Lo H-W, Xia W, Wei Y, Ali-Seyed M, Huang SF, Hung M-C. Novel Prognostic Value of Nuclear EGF Receptor in Breast Cancer. *Cancer Research* 2005;65:338-48.
